# Supplementary material for: Mesoporous Co–B–N–H nanowires: superior catalysts for decomposition of hydrous hydrazine to generate hydrogen
Source: Royal Society of Chemistry journal article supplement (doi:10.1039/c4cy00437j), 2014-05-19
Supplement: c4cy00437j1.pdf [file c4cy00437j1.pdf]

## SUPPORTING INFORMATION

### **Mesoporous Co-B-N-H nanowires: a superior catalyst for hydrous hydrazine decomposition to generate hydrogen**

FanYang<sup>a,b</sup>, Yuan Zhi Li<sup>a,c</sup>, Wei Chu<sup>d\*</sup>, Chun Li<sup>a,b</sup> and D.G. Tong<sup>a,b\*</sup>

<sup>a</sup>*Mineral Resources Chemistry Key Laboratory of Sichuan Higher Education Institutions, College of Materials and Chemistry & Chemical Engineering, Chengdu University of Technology, Chengdu 610059, China. E-mail: [tongdongge@163.com](mailto:tongdongge@163.com); Fax: +86-28-8407 9074*

<sup>b</sup>*State Key Laboratory of Oil and Gas Reservoir Geology and Exploitation, Chengdu University of Technology, Chengdu 610059, China.*

<sup>c</sup>*Institute of Coal Chemistry, Chinese Academy of Science, Taiyuan 030001, China*

<sup>d</sup>*College of Chemical Engineering, Sichuan University, Chengdu 610065, China. E-mail: [chuwei1965@foxmail.com](mailto:chuwei1965@foxmail.com); Fax: +86-28-8540 3397*

Summary: 22 Pages; 1 Table; 31 Figures;

**Table S1** Catalytic performance of different catalysts for N<sub>2</sub>H<sub>4</sub> decomposition

| Samples                                                                                             | Temperature/ °C | S <sub>Co</sub> /m <sup>2</sup><br>g <sup>-1</sup> | H <sub>2</sub> generation<br>volume/mL | H <sub>2</sub> selectivity<br>/% | Time/min | TOF<br>/min <sup>-1</sup> | TTON   | ATOF/<br>min <sup>-1</sup> |
|-----------------------------------------------------------------------------------------------------|-----------------|----------------------------------------------------|----------------------------------------|----------------------------------|----------|---------------------------|--------|----------------------------|
| CoB <sub>0.358</sub> N <sub>0.286</sub> H <sub>0.251</sub> nanowires in this work                   | 293K            | 72.8                                               | 2240.0                                 | 100.0                            | 17       | 76.0                      | 133020 | 73.9                       |
| Conventional Co-B in this work                                                                      | 293K            | 18.7                                               | 22.8                                   | 1.02                             | 91       | 4.83                      | -      | -                          |
| Conventional Co-B after SPP treatment with NH <sub>4</sub> Cl                                       | 293K            | 18.8                                               | 149.6                                  | 6.67                             | 60       | 20.9                      | -      | -                          |
| Co-B nanowires in our work                                                                          | 293K            | 55.0                                               | 545.1                                  | 24.3                             | 24       | 15.1                      | -      | -                          |
| CoB <sub>0.336</sub> N <sub>0.215</sub> H <sub>0.143</sub> obtained in our work after SPP for 2 min | 293K            | 48.6                                               | 1486.4                                 | 66.4                             | 33       | 40.5                      | -      | -                          |
| CoB <sub>0.292</sub> N <sub>0.113</sub> H <sub>0.072</sub> obtained in our work after SPP for 1 min | 293K            | 45.8                                               | 1151.3                                 | 51.4                             | 49       | 25.1                      | -      | -                          |
| Co-B obtained in our work after SPP for 0.5 min                                                     | 293K            | 16.2                                               | 17.9                                   | 0.799                            | 82       | 4.68                      | -      | -                          |
| In situ Rh <sub>4</sub> Ni <sup>16</sup>                                                            | 298K            | -                                                  | 89.6                                   | 100.0                            | 160      | 0.25                      | -      | -                          |
| In situ Ni <sub>0.93</sub> Pt <sub>0.07</sub> <sup>17</sup>                                         | 298K            | -                                                  | 89.6                                   | 100.0                            | 190      | 0.0021                    | -      | -                          |
| In situ Ni <sub>0.95</sub> Ir <sub>0.05</sub> <sup>18</sup>                                         | 298K            | -                                                  | 89.6                                   | 100.0                            | 390      | 0.26                      | -      | -                          |
| NiFe <sup>19</sup>                                                                                  | 298K            | -                                                  | 89.6                                   | 100.0                            | 190      | -                         | -      | -                          |
| In situ Rh <sub>4.69</sub> Ni/graphene <sup>20</sup>                                                | 298K            | -                                                  | 89.6                                   | 100.0                            | 49       | 1.91                      | -      | -                          |
| Ni-Al <sub>2</sub> O <sub>3</sub> -HT <sup>21</sup>                                                 | 303K            | -                                                  | -                                      | 93.0                             | 70       | 0.033                     | -      | -                          |
| NiPt <sub>0.057</sub> /Al <sub>2</sub> O <sub>3</sub> <sup>22</sup>                                 | 303K            | -                                                  | 70.2                                   | 98.0                             | 11.5     | 0.28                      | -      | -                          |
| NiIr <sub>0.059</sub> /Al <sub>2</sub> O <sub>3</sub> <sup>23</sup>                                 | 303K            | -                                                  | -                                      | 99.0                             | 12.5     | 0.21                      | -      | -                          |
| Monodispersed Ni <sub>3</sub> Fe nanospheres / C <sup>24</sup>                                      | 293K            | -                                                  | 224.0                                  | 100.0                            | 27       | 9.26                      | 15840  | 8.8                        |
| 9.86wt%Fe-B/MWCNTs <sup>27</sup>                                                                    | 298K            | 78.7                                               | 4345.6                                 | 97.0                             | 15.2     | 67.2                      | 114480 | 63.6                       |
| NiMoB-La(OH) <sub>3</sub> <sup>28</sup>                                                             | 323K            | -                                                  | 136.0                                  | 100.0                            | 15       | 0.24                      | -      | -                          |
| Amorphous Ni <sub>0.9</sub> Pt <sub>0.1</sub> /Ce <sub>2</sub> O <sub>3</sub> <sup>29</sup>         | 298K            | -                                                  | 172.0                                  | 100.0                            | 43       | 0.47                      | -      | -                          |
| Co-B honeycomb <sup>40</sup>                                                                        | 298K            | 90.2                                               | 1872.6                                 | 41.8                             | 13       | 12.6                      | 18360  | 10.2                       |
| Co-B nanospheres <sup>43</sup>                                                                      | 298K            | 81.1                                               | 954.2                                  | 21.3                             | 23       | 5.34                      | -      | -                          |

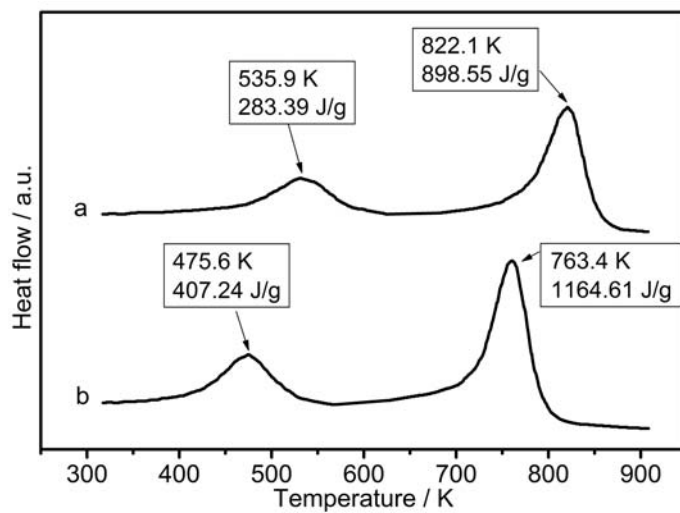

**Fig.S1** DSC profiles of (a) Co-B-N-H nanowires and (b) Conventional Co-B amorphous alloy.

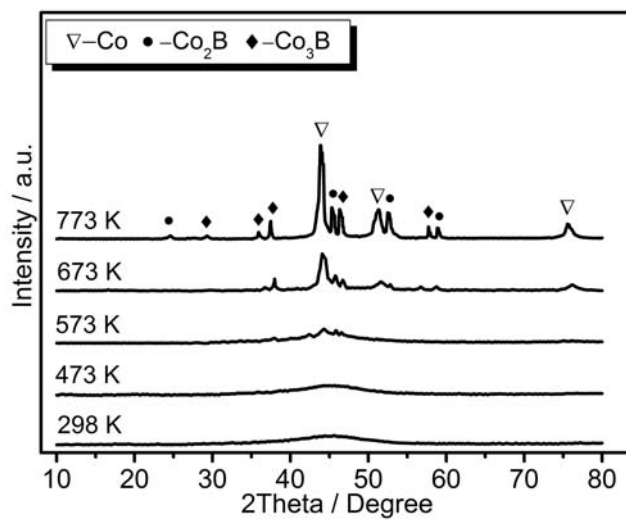

**Fig.S2** XRD patterns of the conventional Co-B amorphous alloy treated at different temperatures.

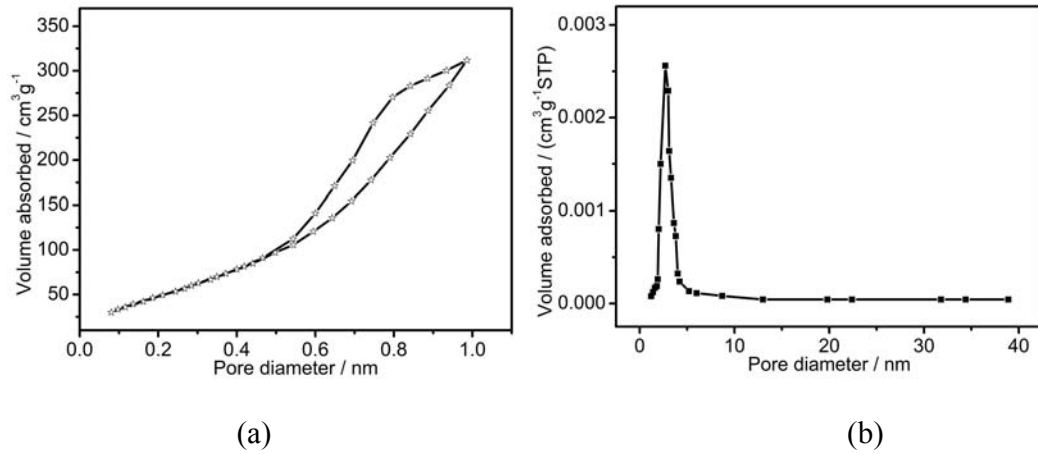

**Fig.S3** (a) Nitrogen sorption isotherms and (b) the corresponding pores diameter distribution of the as-prepared Co-B-N-H nanowires.

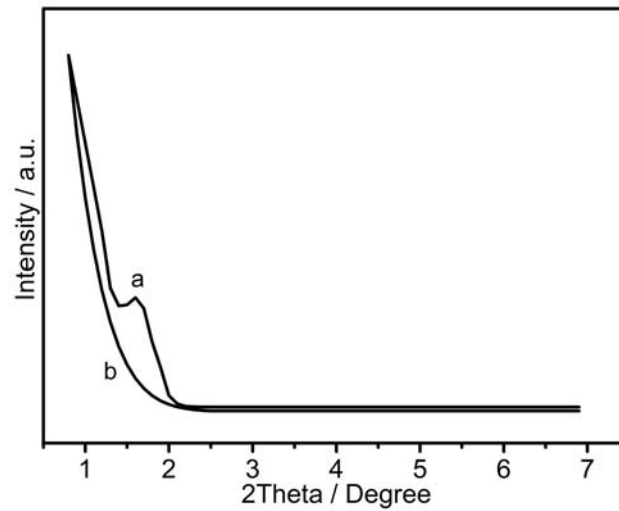

**Fig.S4** Small angle XRD patterns of (a) Co-B-N-H nanowires and (b) Conventional Co-B amorphous alloy

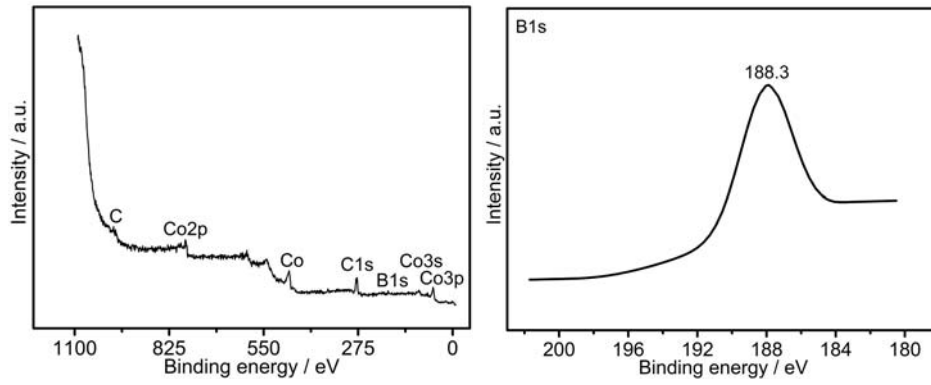

(a)

(b)

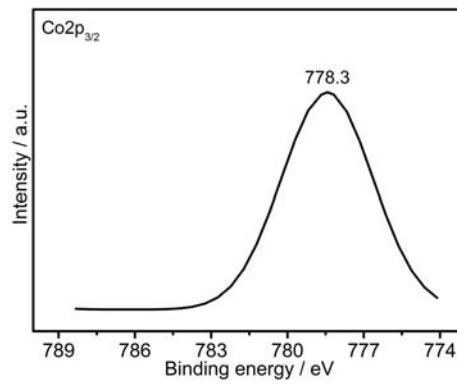

(c)

**Fig.S5** XPS spectra for the conventional Co–B amorphous alloy: (a) survey spectrum, (b) B1s and (c) Co<sub>2p<sub>3/2</sub></sub> spectra.

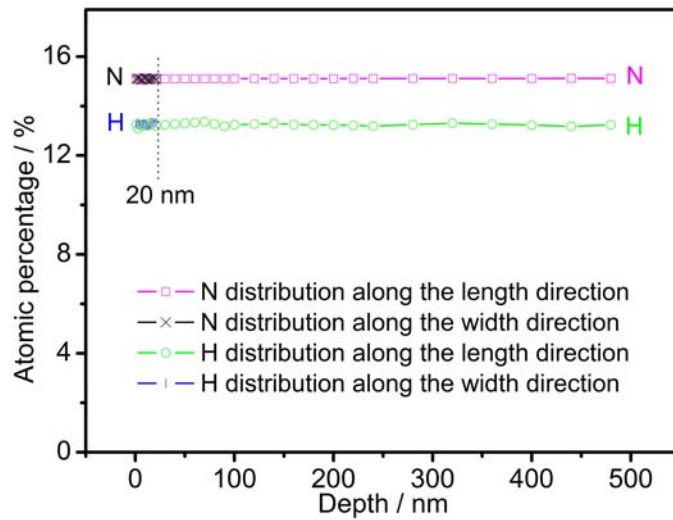

**Fig.S6.** The depth distribution of N and H along the width direction (0-20nm) and length direction (0-480nm) of Co-B-N-H nanowires obtained from the ToF-SIMS depth profiles.

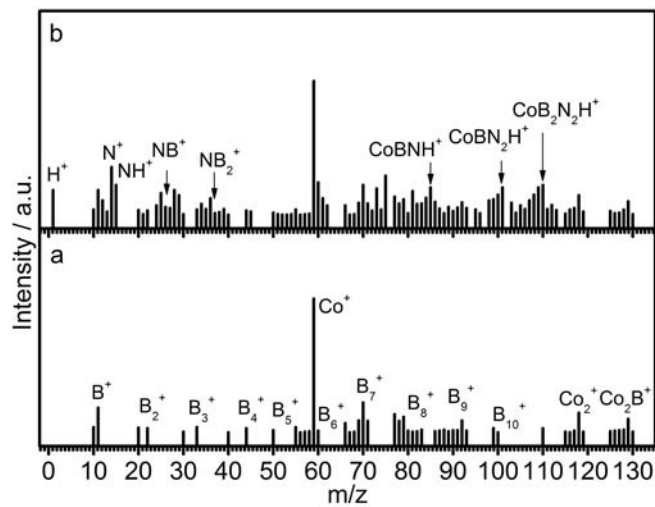

**Fig.S7** ToF-SIMS spectra of (a) the conventional Co-B amorphous alloy and (b) the conventional Co-B after treated by SPP with  $\text{NH}_4\text{Cl}$ .

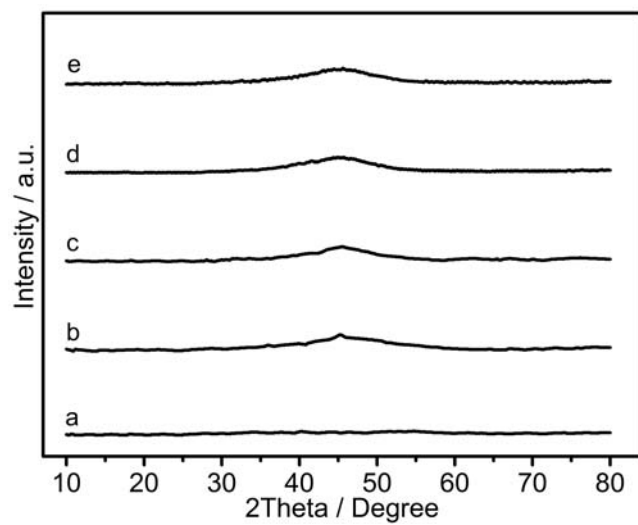

**Fig.S8** XRD patterns of the Co-B-N-H nanowires prepared during SPP: (a) 0.5 min; (b) 1 min; (c) 2 min; (d) 5 min; (e) 10 min.

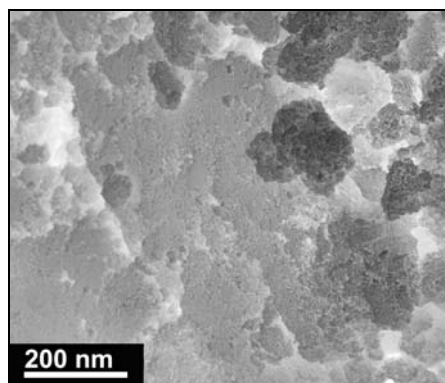

(a)

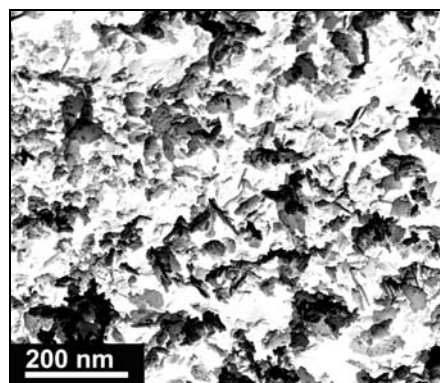

(b)

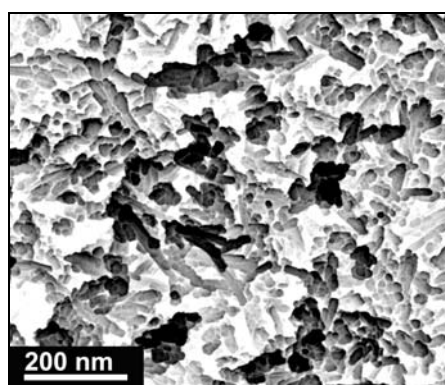

(c)

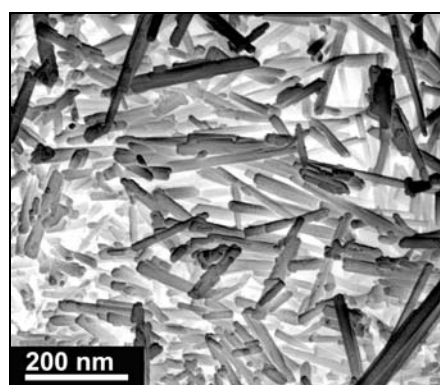

(d)

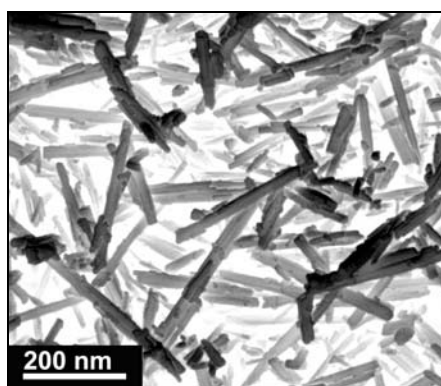

(e)

**Fig.S9** STEM images of the Co-B-N-H nanowires prepared during SPP: (a) 0.5 min; (b) 1 min; (c) 2 min; (d) 5 min; (e) 10 min.



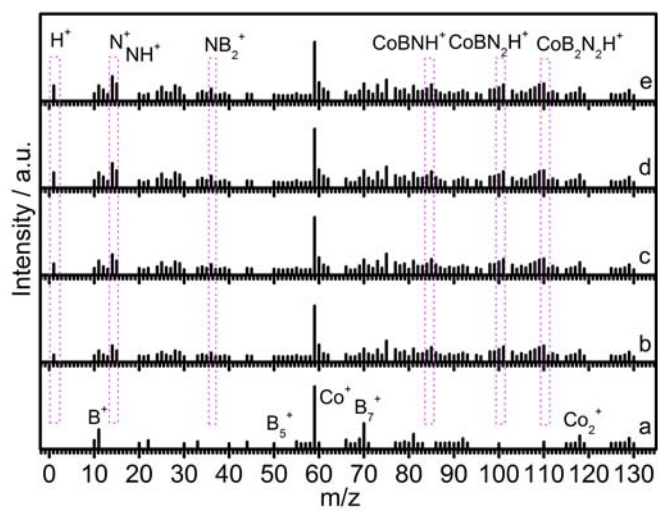

**Fig.S10** ToF-SIMS spectra of the Co–B–N–H nanowires prepared during SPP: (a) 0.5 min; (b) 1 min; (c) 2 min; (d) 5 min; (e) 10 min.

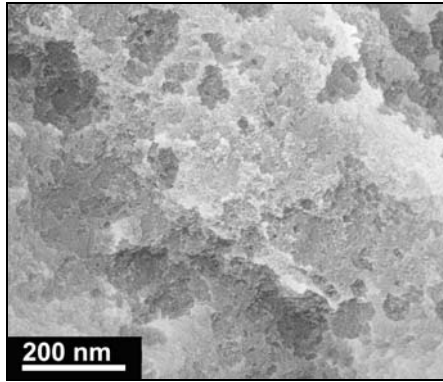

(a)

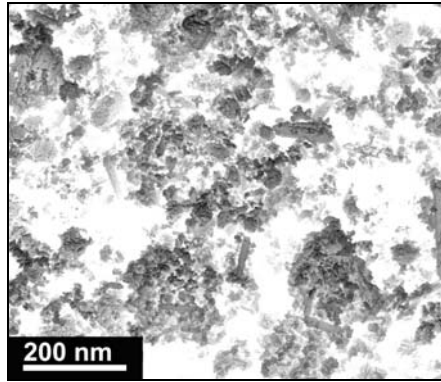

(b)

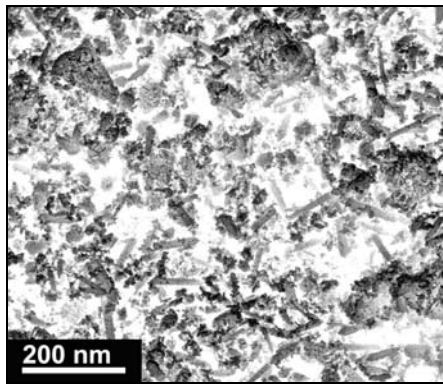

(c)

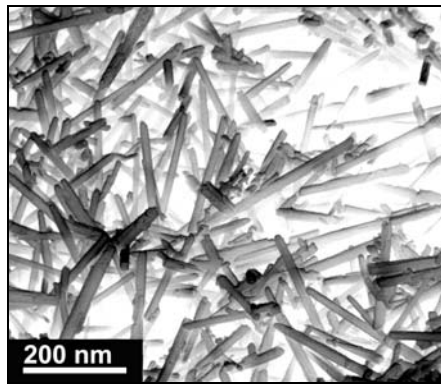

(d)

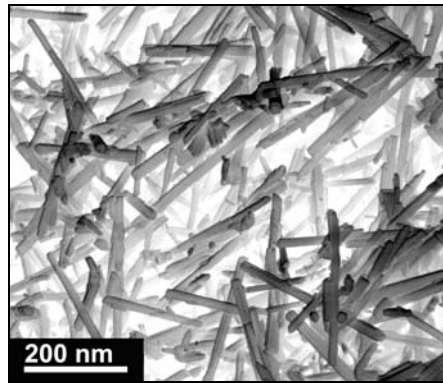

(e)

**Fig.S11** STEM images of the Co-B-N-H nanowires obtained with different concentration of Brij-58: (a) 0 M, (b) 0.01 M, (c) 0.02M, (d) 0.05 M, (e) 0.1 M.

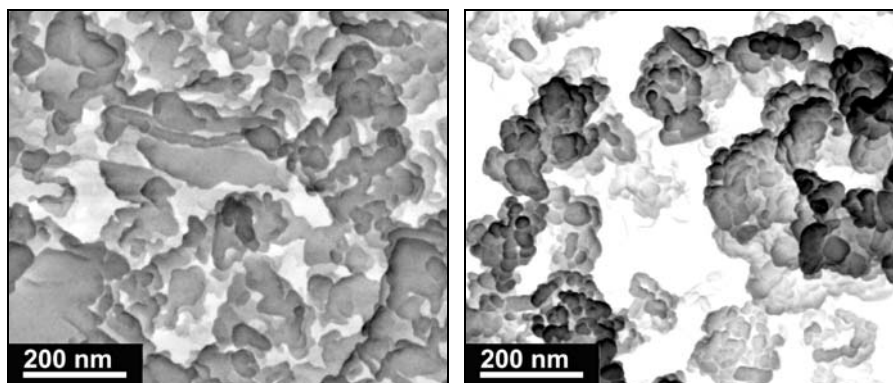

(a)

(b)

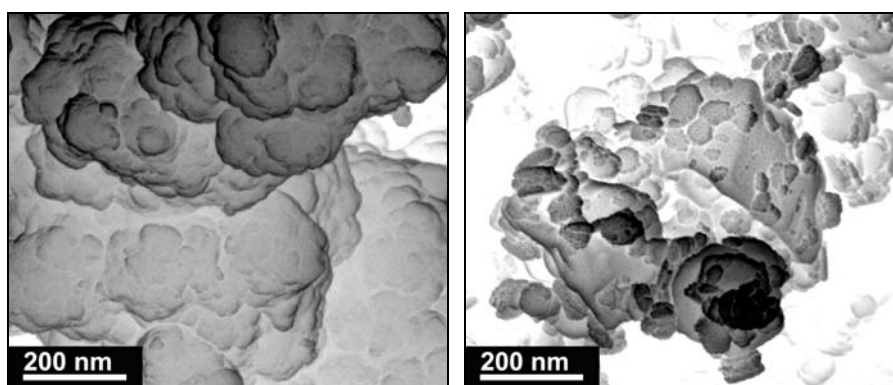

(c)

(d)

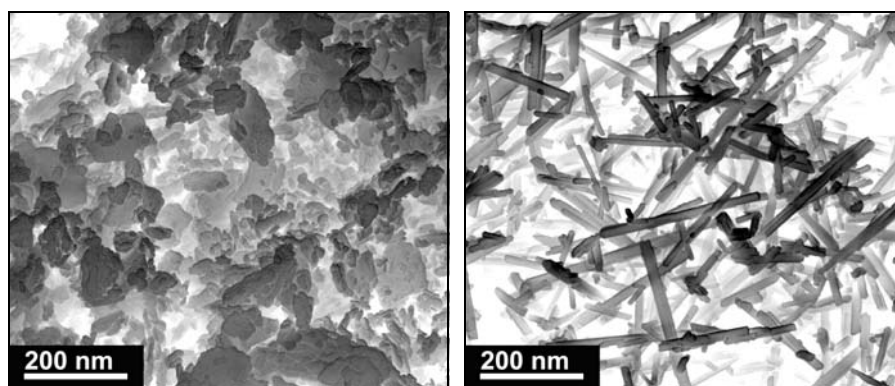

(e)

(f)

**Fig.S12** STEM images of the Co-B-N-H nanowires prepared by SPP with (a) PVA; (b) PVP; (c) P123; (d) ethylenediamine; (e) SDBS and (f) either of (a)–(e) after additional of Brij-58.

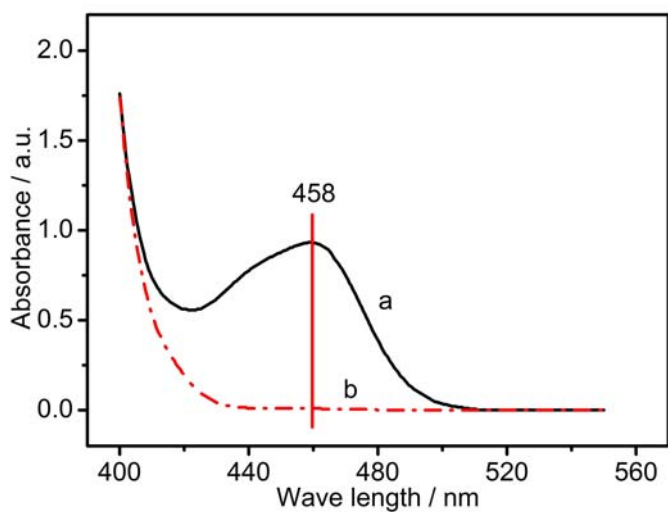

**Fig.S13** Typical UV-Vis spectra of hydrous hydrazine (a) before and (b) after the completion of hydrazine decomposition reaction over Co-B-N-H nanowires.

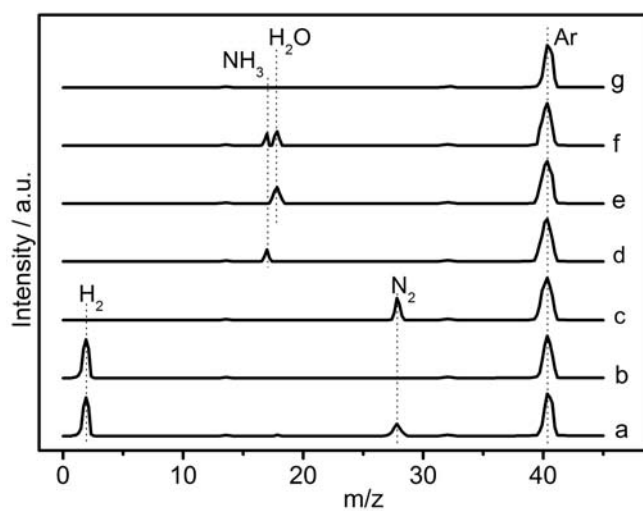

**Fig.S14** Mass spectral (MS) profile of (a) the gases released from the complete decomposition of hydrous hydrazine at room temperature over Co-B-N-H nanowires; (b) H<sub>2</sub>; (c) N<sub>2</sub>; (d) NH<sub>3</sub>; (e) H<sub>2</sub>O; (f) NH<sub>3</sub>+H<sub>2</sub>O; and (g) carrier Ar.

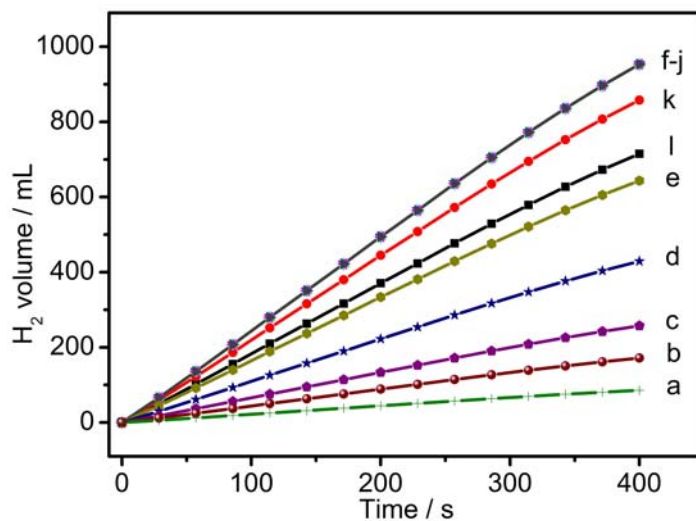

**Fig.S15** Hydrogen released from 20mL  $N_2H_4$  solution with different concentrations (a) 0.01, (b) 0.02, (c) 0.03, (d) 0.05, (e) 0.075, (f) 0.1, (g) 0.2, (h) 0.5, (i) 1, (j) 5, (k) 7.5 and (l)  $10.0\text{molL}^{-1}$  in the presence of 4.6mg Co-B-N-H nanowires.

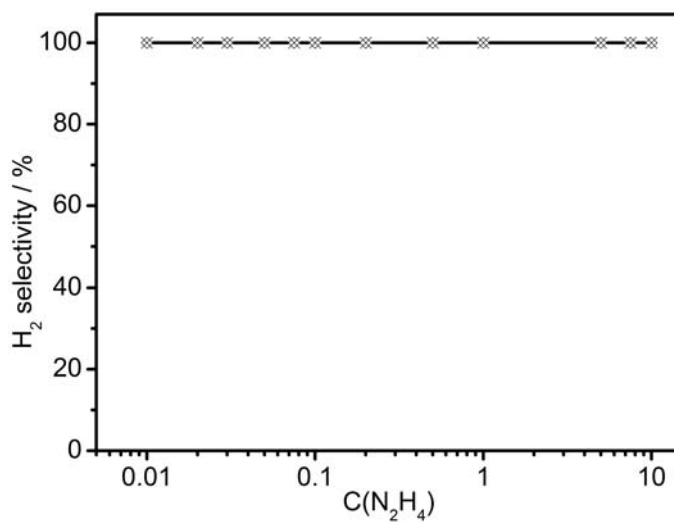

**Fig.S16** Hydrogen selectivity versus  $N_2H_4$  concentrations for the decomposition of  $N_2H_4$  over 4.6mg Co-B-N-H nanowires.

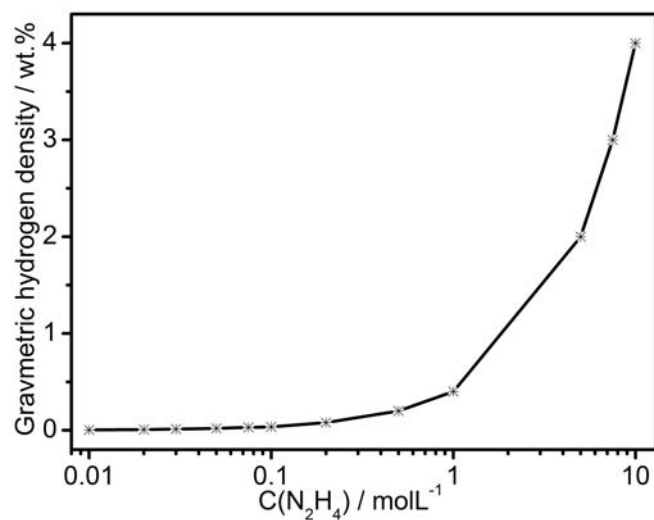

**Fig.S17** Solution gravimetric hydrogen densities versus  $N_2H_4$  concentrations for the decomposition of  $N_2H_4$  over 4.6mg Co–B–N–H nanowires at 293K.

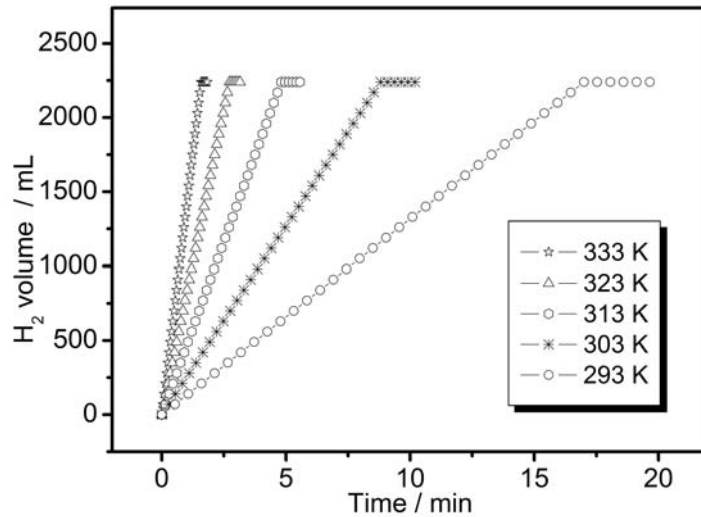

**Fig.S18** Plots of volume of hydrogen generated versus time during the 20 mL  $N_2H_4$  decomposition over 4.6mg Co–B–N–H nanowires at different temperatures in the range 293-333K ( $[N_2H_4] = 5 \text{ molL}^{-1}$ ).

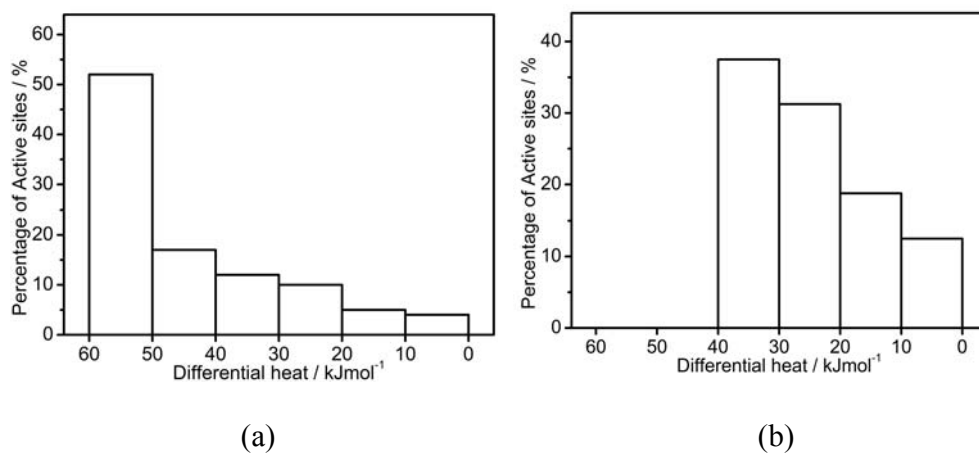

**Fig.S19** The differential heat of H<sub>2</sub> adsorption distribution histograms of (a) Co-B nanowires and (b) Co-B-N-H nanowires.

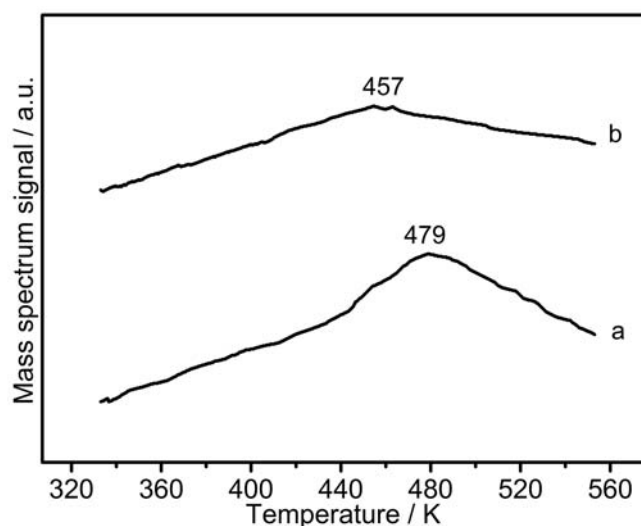

**Fig.S20** Mass spectra of H<sub>2</sub>-TPD for (a) Co-B nanowires and (b) Co-B-N-H nanowires.

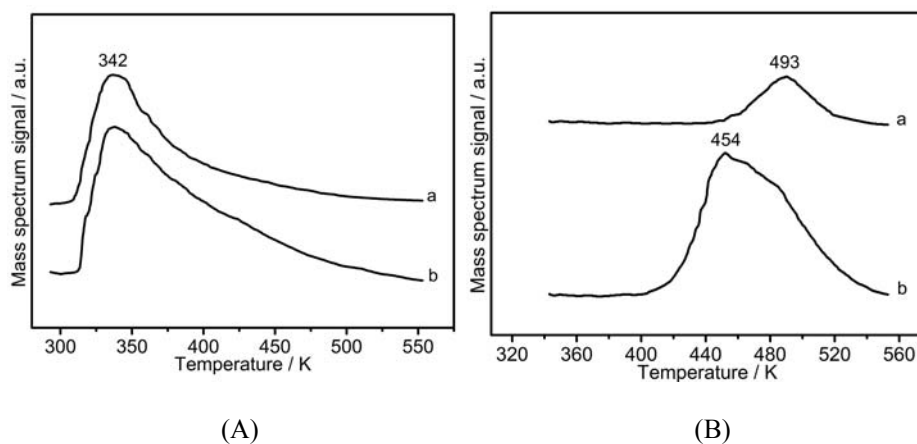

**Fig.S21** Mass spectra of NH<sub>3</sub> TPD-MS for (A) NH<sub>3</sub> desorption signal and (B) N<sub>2</sub> desorption signal for (a) Co-B nanowires and (b) Co-B-N-H nanowires.

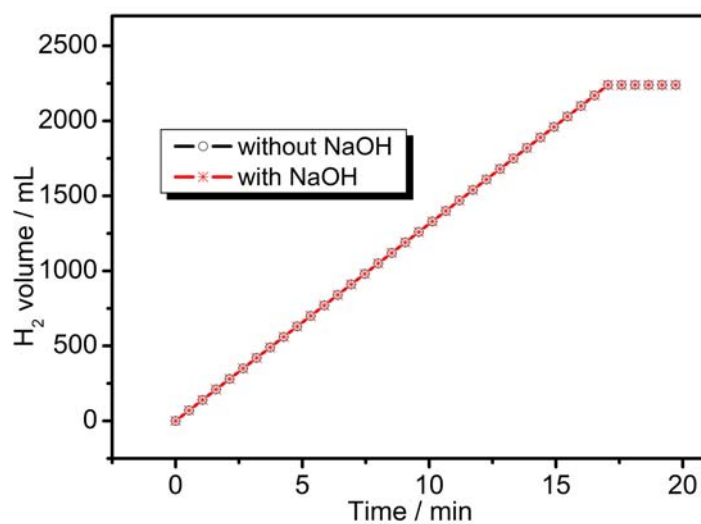

**Fig.S22** Plots of volume of hydrogen generated versus time (a) without adding and (b) adding NaOH during the hydrazine decomposition over Co-B-N-H nanowires.



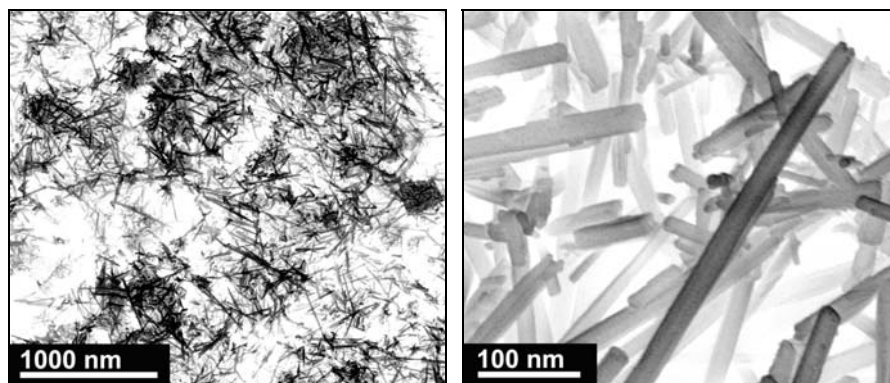

(a)

(b)

**Fig.S23** (a) STEM image and (b) enlarged STEM image of the deactivated Co-B-N-H nanowires.

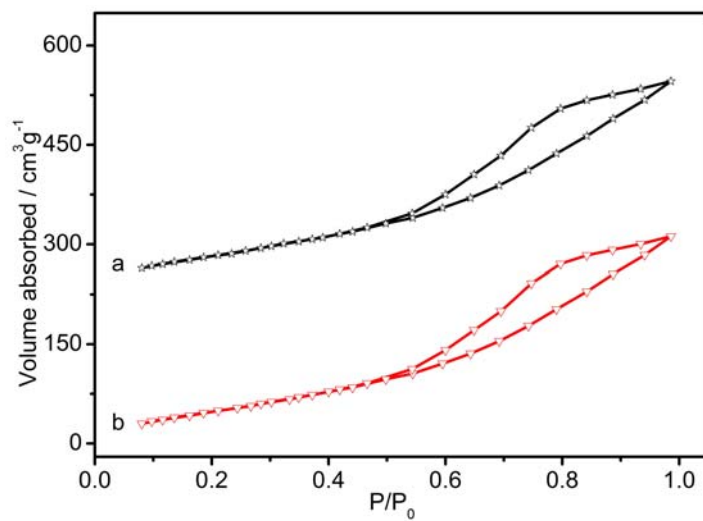

**Fig.S24** Nitrogen sorption isotherms of the deactivated Co-B-N-H nanowires (a) before reactivation and (b) after reactivation by solution plasma process.

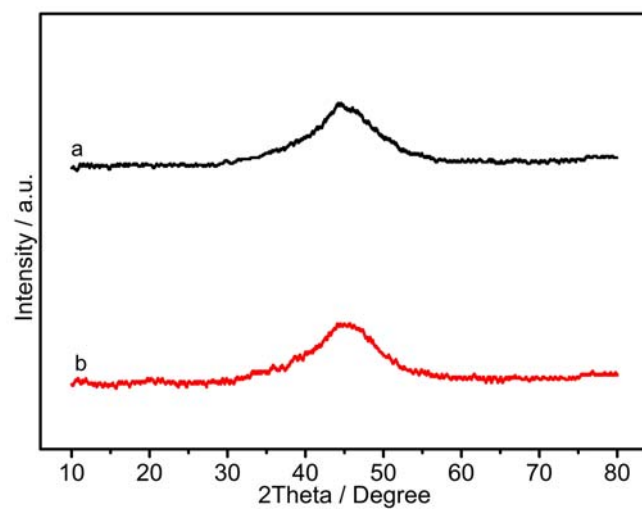

**Fig.S25** XRD profiles of the deactivated Co-B-N-H nanowires (a) before reactivation and (b) after reactivation by solution plasma process.

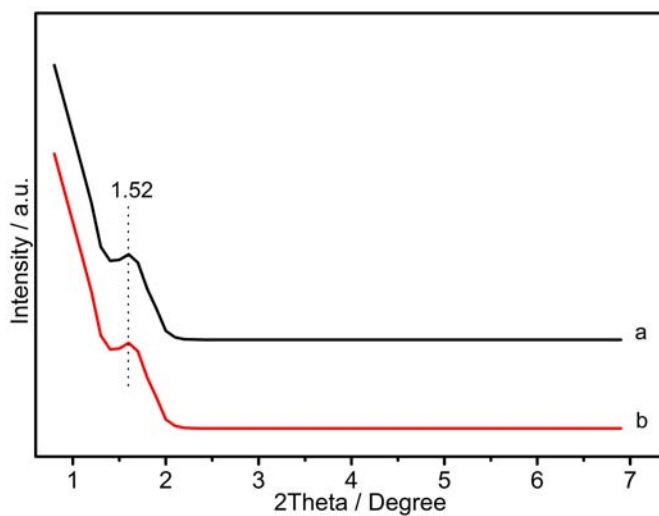

**Fig.S26** Small angle XRD profiles of the deactivated Co-B-N-H nanowires (a) before reactivation and (b) after reactivation by solution plasma process.

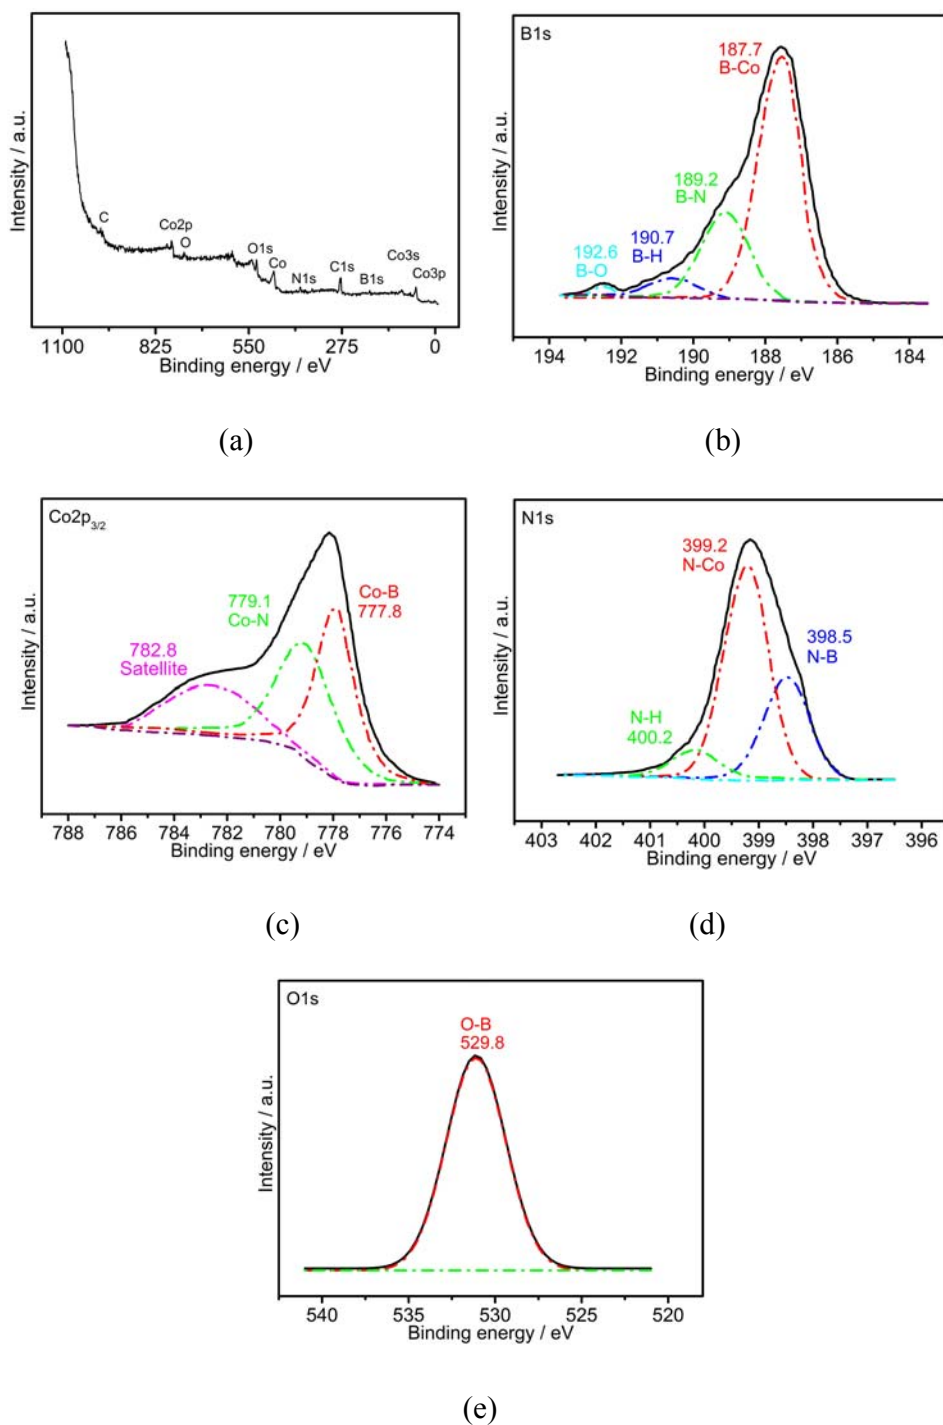

**Fig.S27** (a) Overall XPS spectrum; (b) B1s XPS spectra; (c) Co<sub>2p<sub>3/2</sub></sub> XPS spectra and (d) N1s XPS spectra and (e) O1s XPS spectra of the deactivated Co-B-N-H nanowires.

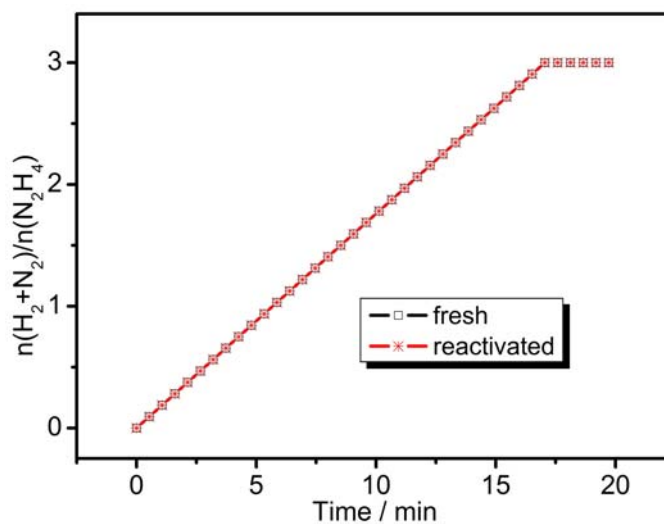

**Fig.S28** Time profiles for decomposition of hydrous hydrazine in the presence (a) fresh and (b) reactivated Co–B–N–H nanowires.

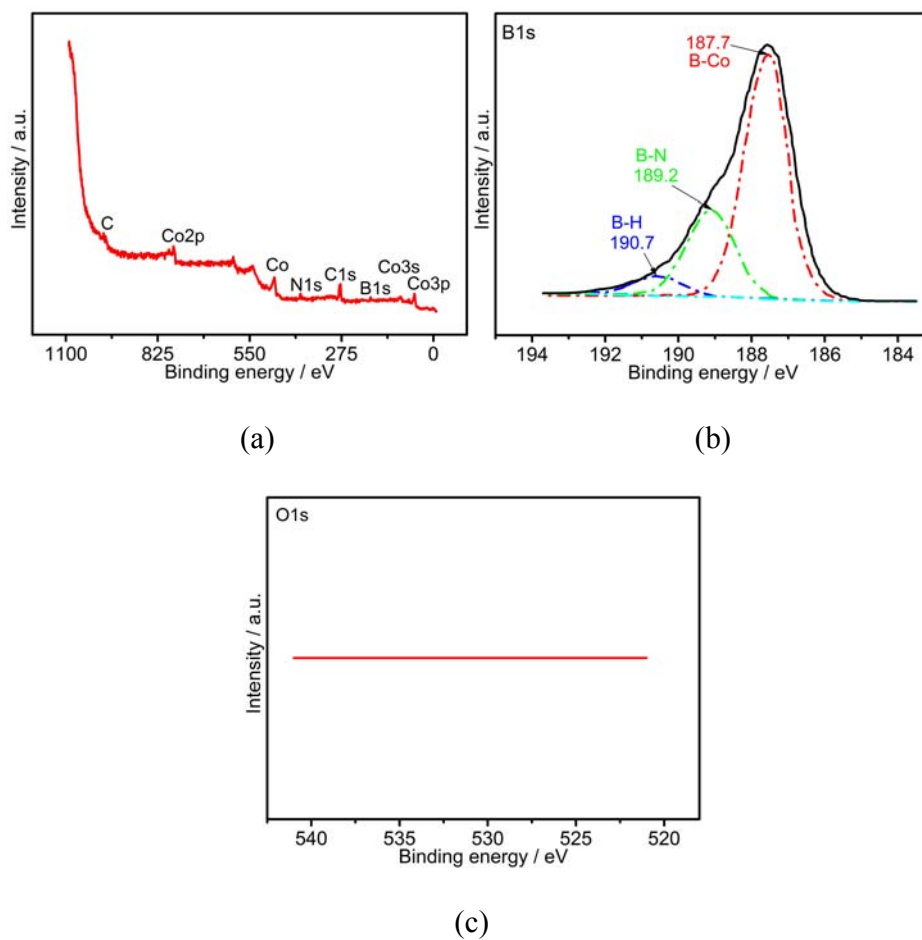

**Fig.S29** (a) Overall XPS spectrum; (b) B1s XPS spectra and (c) O1s XPS spectra of the deactivated Co–B–N–H nanowires after reactivation by solution plasma process.

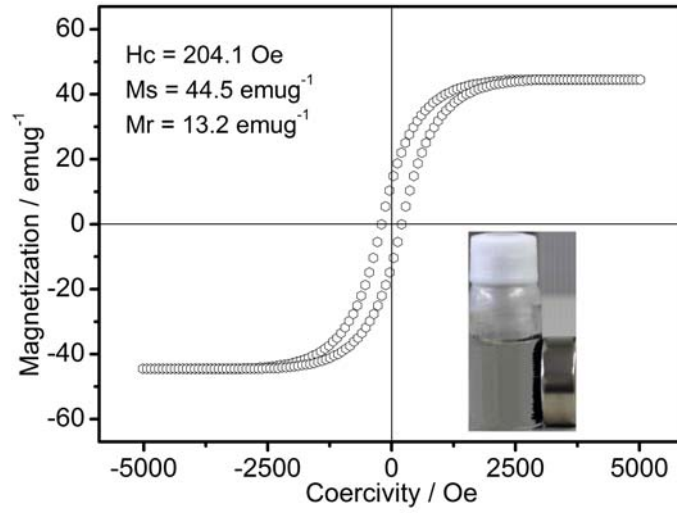

**Fig.S30** Hysteresis loop and magnetic properties of Co-B-N-H nanowires. The inset is the photograph of Co-B-N-H nanowires after magnetic separation.

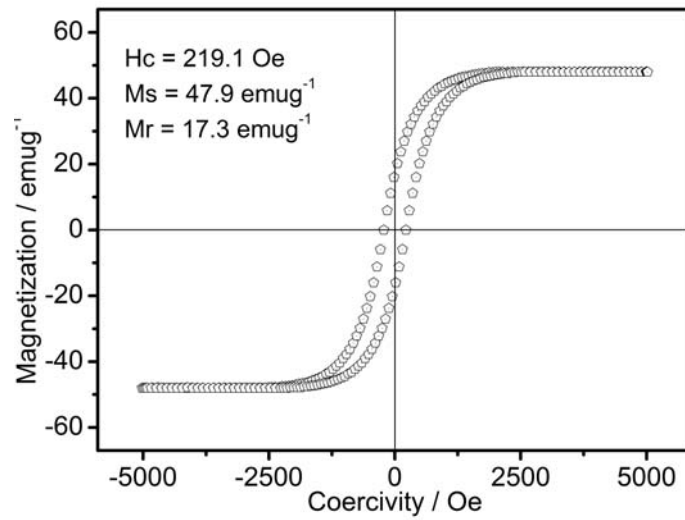

**Fig.S31** Hysteresis loop and magnetic properties of Co-B nanowires.
